# Supplementary material for: Guidelines for DNA recombination and repair studies: Cellular assays of DNA repair pathways
Source: PubMed Central journal article supplement (PMC6334234; doi:10.15698/mic2019.01.664), 2019-01-07
Supplement: mic-06-001-s01.pdf [file mic-06-001-s01.pdf]

| <b>Title</b>                                                                             | <b>Authors</b>                        | <b>Contact information of lead authors</b> |
|------------------------------------------------------------------------------------------|---------------------------------------|--------------------------------------------|
| 1.1 Forward mutation assays                                                              | Nayun Kim                             | nayun.kim@uth.tmc.edu                      |
| 1.2, 1.3 Reversion mutation assays                                                       | Nayun Kim, Sue Jinks-Robertson        | sue.robertson@duke.edu                     |
| 2.1 Sister chromatid recombination                                                       | Belén Gómez-González, Andrés Aguilera | andres.aguilera@cabimer.es                 |
| 2.2 Direct repeat assays                                                                 | Anastasiya Epshtein, Hannah Klein     | hannah.klein@nyumc.org                     |
| 2.3, 2.4 Ade2 assays for mitotic recombination in haploids and diploids                  | Léa Marie, Lorraine Symington         | lss5@cumc.columbia.edu                     |
| 2.5 Detection and analysis of mitotic recombination events                               | Yi Yin, Thomas Petes                  | tom.petes@duke.edu                         |
| 3. Gross chromosomal rearrangements                                                      | Christopher Putnam, Richard Kolodner  | rkolodner@ucsd.edu                         |
| 4.1 Repeat expansions and repeat-mediated genome instability                             | Elina Radchenko, Sergei Mirkin        | sergei.mirkin@tufts.edu                    |
| 4.2 Yeast artificial chromosomes and fragility of DNA sequences                          | Erica Polleys, Catherine Freudenreich | Catherine.Freudenreich@tufts.edu           |
| 5. Chromosome rearrangements associated with gene amplification                          | Juan Lucas Argueso                    | lucas.argueso@colostate.edu                |
| 6. Detection and quantification of DSBs by pulsed field gel electrophoresis              | Sharik R. Khan, Andrei Kuzminov       | kuzminov@life.illinois.edu                 |
| 7.1 Induction of site-specific DSBs and analysis of their repair in budding yeast        | James E. Haber                        | haber@brandeis.edu                         |
| 7.2 DNA double-strand break induction and repair in fission yeast                        | Sandeep Kumar, Grzegorz Ira           | gira@bcm.edu                               |
| 7.3 Quantification of strand-specific single-stranded DNA in DNA repair by real time PCR | Jun Che Sang Eun Lee                  | lees4@uthscsa.edu                          |
| 7.4 Detection of toxic recombination                                                     | Rajula Elango, Anna Malkova           | anna-malkova@uiowa.edu                     |

|                                                                                                                    |                                                        |                                              |
|--------------------------------------------------------------------------------------------------------------------|--------------------------------------------------------|----------------------------------------------|
| intermediates in yeast <i>Saccharomyces cerevisiae</i>                                                             |                                                        |                                              |
| 8. Detection of hypermutable single-strand DNA formed in living yeast cells                                        | Cynthia J. Sakofsky, Dmitry A. Gordenin                | gordenin@niehs.nih.gov                       |
| 9.1 Engineered proteins for detection of DNA double-strand breaks in living bacterial and mammalian cells          | Kyle M. Miller, Devon M Fitzgerald, Susan M. Rosenberg | Kyle.miller@austin.utexas.edu<br>smr@bcm.edu |
| 9.2 Engineered proteins for detection of Holliday junctions in living bacterial cells                              | Jun Xia, Qian Mei, Susan M. Rosenberg                  | smr@bcm.edu                                  |
| 10.1 Single-particle tracking of nucleotide excision repair proteins inside living bacteria                        | Alicja Piotrowska, Mathew Stracy, Pawel Zawadzki       | zawadzki@amu.edu.pl                          |
| 10.2 Inter-foci fluorescence redistribution after photobleaching (iFRAP) to measure dynamics of DNA repair centers | Giedrė Bačinskaja, Michael Lisby                       | m lisby@bio.ku.dk                            |
| 11.1 Visualizing chromosomal dynamics upon DNA double-strand breaks in yeast <i>S. cerevisiae</i>                  | Anais Cheblal, Susan M Gasser                          | susan.gasser@fmi.ch                          |
| 11.2 Quantifying the mobility of a chromosomal locus                                                               | Judith Miné-Hattab, Rodney Rothstein                   | rjr4@cumc.columbia.edu                       |
| 12. A fluorescently-tagged site-specific fork stalling assay                                                       | Anissia Ait Saada, Sarah AE Lambert                    | sarah.lambert@curie.fr                       |
| 13. A microscopy-based assay to measure DNA double-strand break end resection in single fission yeast cells        | Bryan A. Leland, Megan C. King                         | megan.king@yale.edu                          |
